# Supplementary material for: The use of molecular markers for cervical screening of women living with HIV in South Africa
Source: PubMed Central journal article supplement — AIDS. 2019 Aug 2;33(13):2035–42. doi: 10.1097/QAD.0000000000002325 (PMC6791588; doi:10.1097/qad.0000000000002325), 2019-08-02
Supplement: aids-33-2035-s001.pdf [file aids-33-2035-s001.pdf]

**SUPPLEMENTAL DIGITAL CONTENT 1**

Kremer et al., The use of molecular markers for cervical screening of women living with HIV in South Africa.

**Supplemental Table.** Accuracy and diagnostic efficiency of screening strategies to detect CIN2 or worse (CIN2+)

| No.                             | Strategy                                                            | Sensitivity (95% CI) |             | n1/N1 | Specificity (95% CI) |             | n2/N2   | PPV   | NPV   | Referral rate | Referrals needed to detect one CIN3+ | Number of tests/1,000 women screened |
|---------------------------------|---------------------------------------------------------------------|----------------------|-------------|-------|----------------------|-------------|---------|-------|-------|---------------|--------------------------------------|--------------------------------------|
| <i>Cytology-based screening</i> |                                                                     |                      |             |       |                      |             |         |       |       |               |                                      |                                      |
| 1                               | Cytology (≥HSIL)                                                    | 50.5%                | (40.3-60.8) | 46/91 | 95.9%                | (93.1-98.7) | 186/194 | 85.2% | 80.5% | 18.9%         | 1.2                                  | 1000                                 |
| 2                               | Cytology (≥HSIL) with <i>FAM19A4/miR124-2</i> triage of ASC-US/LSIL | 65.9%                | (56.2-75.7) | 60/91 | 92.8%                | (89.1-96.4) | 180/194 | 81.1% | 85.3% | 26.0%         | 1.2                                  | 1095                                 |
| 3                               | <i>FAM19A4/miR124-2</i> with cytology (≥ASC-US) triage              | 59.3%                | (49.2-69.4) | 54/91 | 93.8%                | (90.4-97.2) | 182/194 | 93.8% | 83.1% | 23.2%         | 1.2                                  | 1674                                 |
| <i>HPV-based screening</i>      |                                                                     |                      |             |       |                      |             |         |       |       |               |                                      |                                      |
| 4                               | HPV                                                                 | 78.0%                | (69.5-86.5) | 71/91 | 72.2%                | (65.9-78.5) | 140/194 | 56.8% | 87.5% | 43.9%         | 1.8                                  | 1000                                 |
| 5                               | HPV with <i>FAM19A4/miR124-2</i> triage                             | 67.0%                | (57.4-76.7) | 61/91 | 81.4%                | (76.0-86.9) | 158/194 | 62.9% | 84.0% | 34.0%         | 1.6                                  | 1440                                 |
| 6                               | HPV16/18 with <i>FAM19A4/miR124-2</i> triage of non-16/18HPV+       | 72.5%                | (63.4-81.7) | 66/91 | 80.4%                | (74.8-86.0) | 156/194 | 63.5% | 86.2% | 36.5%         | 1.6                                  | 1315                                 |

Abbreviations: cytology with threshold high-grade squamous intraepithelial lesion or worse (≥HSIL, includes atypical squamous cells - cannot exclude HSIL); cytology with threshold atypical squamous cells of unknown significance or worse (≥ASC-US); LSIL, low-grade squamous intraepithelial lesion; 95% CI, 95% confidence interval; n1, number of screen-positive disease cases; N1, total number of disease cases; n2, number of screen-negative non-disease cases; N2, total number of non-disease cases; PPV, positive predictive value; NPV, negative predictive value.

**A.**

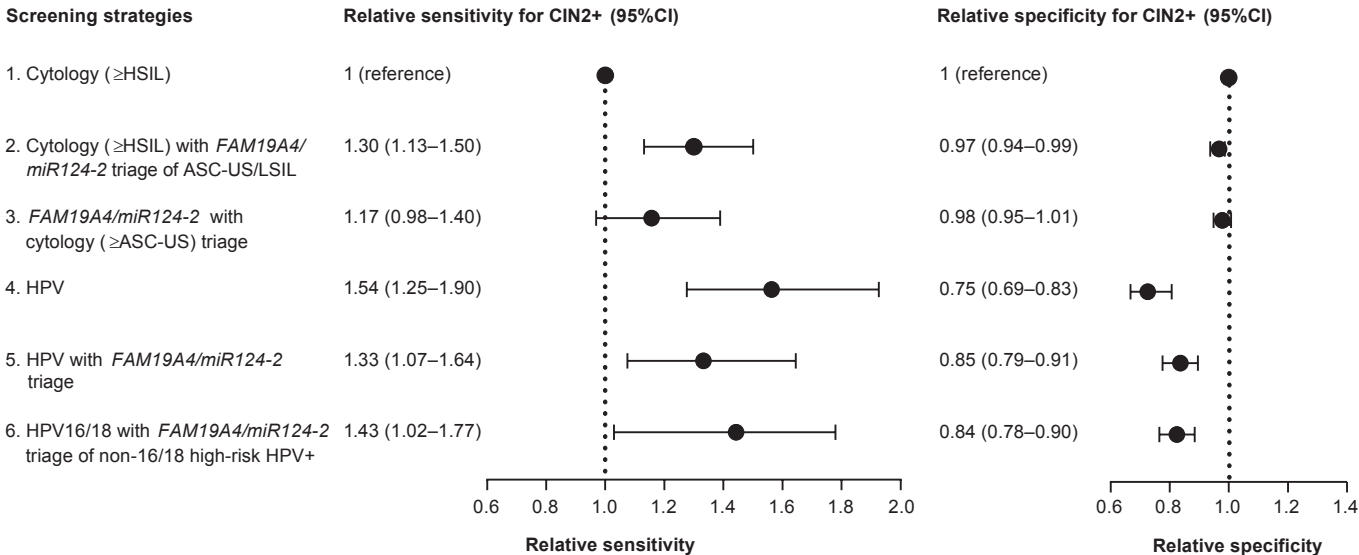

**B.**

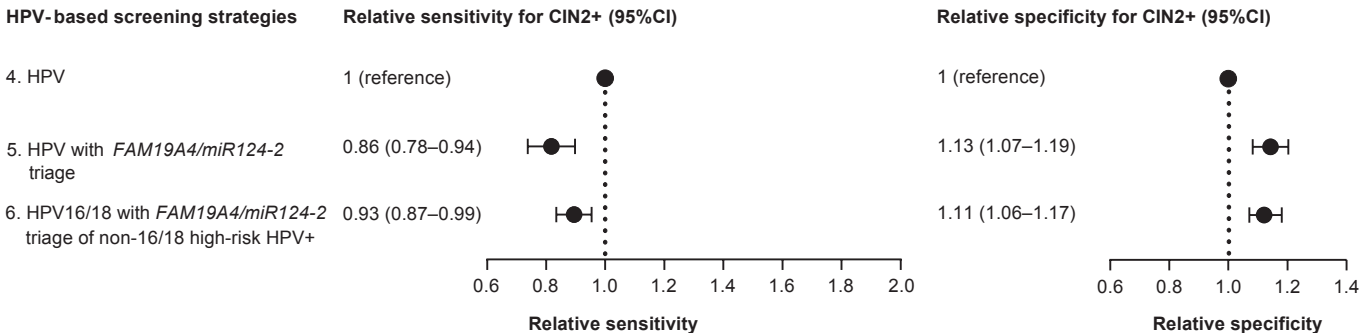

**Figure.** Forest plots showing the relative sensitivities and specificities for the detection of CIN2 or worse (CIN2+) of different screening strategies compared with (A) cytology (threshold  $\geq$ HSIL); and (B) HPV-based strategies  
 Abbreviations: HSIL, high-grade squamous intraepithelial lesion; ASC-US, atypical squamous cells of unknown significance; LSIL, low-grade squamous intraepithelial lesion; 95%CI, 95% confidence interval

**SUPPLEMENTAL DIGITAL CONTENT 3**

Kremer et al., The use of molecular markers for cervical screening of women living with HIV in South Africa.

**Supplemental Table.** Complementarity of *FAM19A4/miR124-2* methylation analysis to cytology-based (A) and HPV-based (B) screening strategies.

| A.                   | ≤CIN2      |              | CIN3+     |              | B.                                     | ≤CIN2     |              | CIN3+     |              |
|----------------------|------------|--------------|-----------|--------------|----------------------------------------|-----------|--------------|-----------|--------------|
|                      | n          | %            | n         | %            |                                        | n         | %            | n         | %            |
| <b>NILM</b>          | <b>186</b> | <b>82.3%</b> | <b>18</b> | <b>30.5%</b> | <b>High-risk HPV positive</b>          | <b>76</b> | <b>33.6%</b> | <b>49</b> | <b>83.1%</b> |
| methylation negative | 74         | 39.8%        | 4         | 22.2%        | methylation negative                   | 22        | 28.9%        | 6         | 12.2%        |
| methylation positive | 112        | 60.2%        | 14        | 77.8%        | methylation positive                   | 54        | 71.1%        | 43        | 87.8%        |
| <b>ASC-US/LSIL</b>   | <b>21</b>  | <b>9.3%</b>  | <b>6</b>  | <b>10.2%</b> | <b>HPV16/18 positive</b>               | <b>14</b> | <b>6.2%</b>  | <b>21</b> | <b>35.6%</b> |
| methylation negative | 6          | 28.6%        | 1         | 16.7%        | methylation negative                   | 3         | 21.4%        | 4         | 19.0%        |
| methylation positive | 15         | 71.4%        | 5         | 83.3%        | methylation positive                   | 11        | 78.6%        | 17        | 81.0%        |
| <b>≥HSIL</b>         | <b>19</b>  | <b>8.4%</b>  | <b>35</b> | <b>59.3%</b> | <b>Non16/18 high-risk HPV positive</b> | <b>62</b> | <b>27.4%</b> | <b>28</b> | <b>47.5%</b> |
| methylation negative | 5          | 26.3%        | 3         | 8.6%         | methylation negative                   | 19        | 30.6%        | 2         | 7.1%         |
| methylation positive | 14         | 73.7%        | 32        | 91.4%        | methylation positive                   | 43        | 69.4%        | 26        | 92.9%        |

Abbreviations: ≤CIN2, CIN2 or less; CIN3+, CIN3 or worse; ≥HSIL, cytology with threshold high-grade squamous intraepithelial lesion or worse (includes atypical squamous cells - cannot exclude HSIL); ASC-US, atypical squamous cells of unknown significance; LSIL, low-grade squamous intraepithelial lesion.
